# Supplementary material
Source: Springer Nature journal article supplement (https://www.springermedizin.de/resource/supplementary/12933_2010_277_MOESM4_ESM.pdf/9539996)

### Acceptable Pulse Pressure

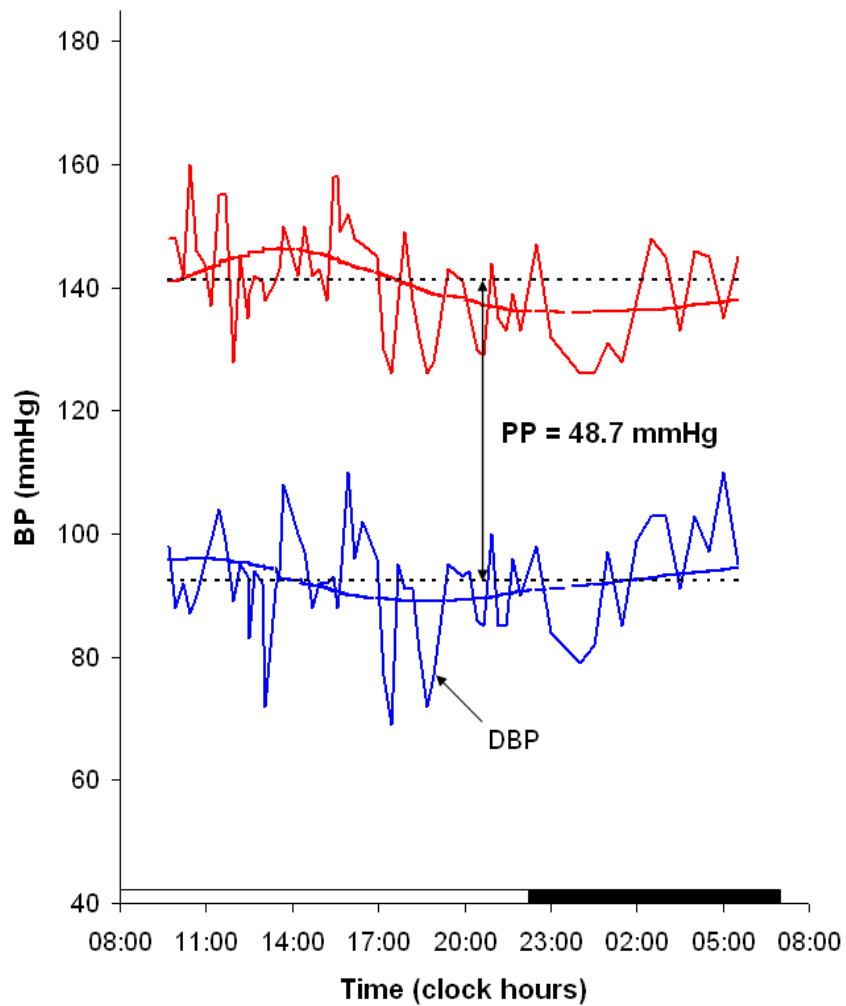

### Excessive Pulse Pressure

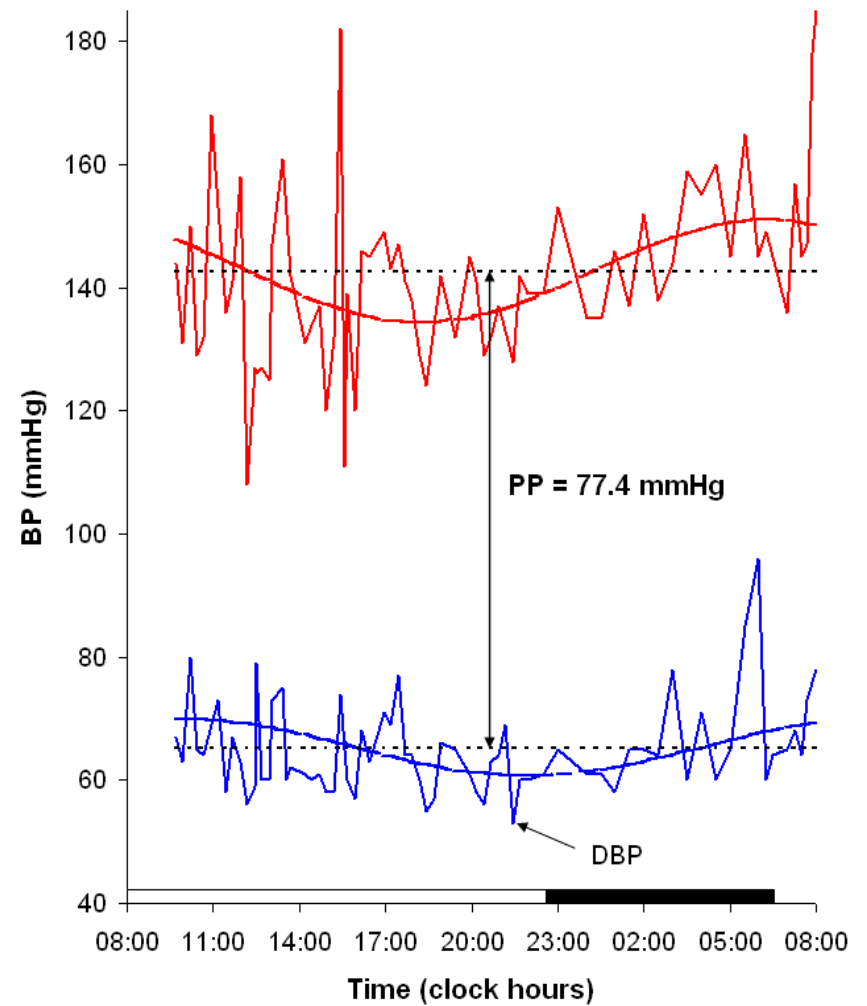

Supplement: MOESM4 [file 9539996]
